# Supplementary material
Source: PubMed Central journal article supplement (PMC4238927)
Supplement: NIHMS608194-supplement-Appendix_1.pdf [file NIHMS608194-supplement-Appendix_1.pdf]

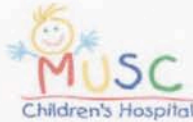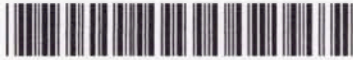

\*PHYSORDER\*  
 Neonatal Ventilator Management Order for  
 Conventional Pressure-Limited Ventilation

Page 2 of 4

Form Origination Date: 7/05  
 Version: 1

Version Date: 3/08

Patient Name \_\_\_\_\_  
 MRN \_\_\_\_\_

PATIENT IDENTIFICATION LABEL

**Tidal Volume (TV) (cc/kg/breath):** Adjust with change in  $\Delta P$  (PIP – PEEP), typically, **but not always**, by altering PIP.

Avoid reduction of PEEP below 4 – 5 cm H<sub>2</sub>O in an effort to avoid “atelectrauma”. Note: PIP refers to the total inspiratory pressure (PEEP plus incremental pressure over PEEP)

|                                     |     |   |                 |   |   |     |
|-------------------------------------|-----|---|-----------------|---|---|-----|
| Tidal Volume (TV)<br>(cc/kg/breath) | < 3 | 3 | 4               | 5 | 6 | > 6 |
|                                     | IE  | T | No need to wean | W | W | IE  |
| Alternate Interpretation            |     |   |                 |   |   |     |

**Minute Ventilation (MV) (usually 240 – 360 cc/kg/min):** Adjust with  $\Delta P$  or ventilator rate, with goal of reducing TV first, then rate.

|                                                          |       |           |           |           |       |
|----------------------------------------------------------|-------|-----------|-----------|-----------|-------|
| Minute Ventilation (MV)<br>(usually 240 – 360 cc/kg/min) | < 160 | 160 - 240 | 240 - 360 | 361 - 400 | > 400 |
|                                                          | IE    | T         | W         | W         | IE    |
| Alternate Interpretation                                 |       |           |           |           |       |

**BLOOD GAS RESULTS: (Based on expectations for arterial samples; adjustments should be made for venous / capillary samples.)**

**pH:** Evaluate whether pH outside of desired range is of respiratory or metabolic origin before making ventilator change.

If of respiratory origin, adjust minute ventilation as outlined above. If  $paO_2$  /  $O_2$  saturation less than desired, wean rate rather than PIP.

|                          |        |             |             |        |
|--------------------------|--------|-------------|-------------|--------|
| pH                       | < 7.25 | 7.25 – 7.27 | 7.28 – 7.35 | > 7.35 |
|                          | IE     | T           | W           | IE     |
| Alternate Interpretation |        |             |             |        |

**PCO<sub>2</sub>:** Adjustment made by manipulating minute ventilation as outlined above. If  $paO_2$  /  $O_2$  sats less than desired, wean rate rather than PIP.

Changes should be made based on  $pCO_2$  rather than pH

|                          |      |         |         |         |      |
|--------------------------|------|---------|---------|---------|------|
| PCO <sub>2</sub>         | < 41 | 41 - 45 | 46 - 55 | 56 - 60 | > 60 |
|                          | IE   | W       | W       | T       | IE   |
| Alternate Interpretation |      |         |         |         |      |

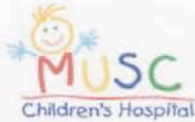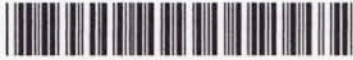

\*PHYSORDER\*  
 Neonatal Ventilator Management Order for  
 Conventional Pressure-Limited Ventilation  
 Page 3 of 4

Form Origination Date: 7/05  
 Version: 1

Version Date: 3/08

Patient Name \_\_\_\_\_  
 MRN \_\_\_\_\_  
**PATIENT IDENTIFICATION LABEL**

**PaO<sub>2</sub>:** Adjust by manipulating mean airway pressure (primarily by adjusting PEEP, but possibly PIP or inspiratory time) or FiO<sub>2</sub>  
 Generally do not wean PEEP until FiO<sub>2</sub> < 0.40  
 Avoid reduction of PEEP below 4 – 5 cm H<sub>2</sub>O to avoid “atelectrauma”

**For Infants of 23 – 31 weeks gestation:**

|                          |      |         |         |         |      |
|--------------------------|------|---------|---------|---------|------|
| <b>PaO<sub>2</sub></b>   | < 41 | 41 - 50 | 51 - 60 | 61 - 65 | > 65 |
|                          | IE   | T       | W       | W       | IE   |
| Alternate Interpretation |      |         |         |         |      |

**For Infants of 32 – 36 weeks gestation:**

|                          |      |         |         |      |
|--------------------------|------|---------|---------|------|
| <b>PaO<sub>2</sub></b>   | < 50 | 51 - 55 | 56 - 70 | > 70 |
|                          | IE   | T       | W       | IE   |
| Alternate Interpretation |      |         |         |      |

paO<sub>2</sub> is to override pulse oximeter saturations and nursery pulse oximeter protocol is to be suspended

**Pulse Oximeter Saturations:** wean FiO<sub>2</sub> per nursery protocol

Pulse oximeter saturations are to override paO<sub>2</sub>

**Minimum mechanical ventilator rate** for any baby unless specifically ordered: 15 breaths per minute

**Minimum Peak Inspiratory Pressure (PIP) and Pressure Support (PS)** unless specifically ordered:

| Weight (grams) | Minimum PIP (cm H <sub>2</sub> O) | PS                                                             |
|----------------|-----------------------------------|----------------------------------------------------------------|
| < 750          | 13                                | Initial = 50% of ΔP<br>Weaning = 30% of ΔP<br>Minimum = 4<br>* |
| 750 - 1000     | 14                                |                                                                |
| 1001 - 1500    | 15                                |                                                                |
| > 1500         | 16                                |                                                                |

\*ΔP = PIP – PEEP; if unable to wean, discuss and consider increasing PS to 50% of ΔP

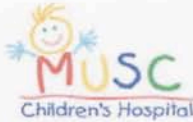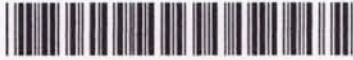

\*PHYSORDER\*  
 Neonatal Ventilator Management Order for  
 Conventional Pressure-Limited Ventilation  
 Page 4 of 4

Form Origination Date: 7/05  
 Version: 1

Version Date: 3/08

Patient Name \_\_\_\_\_  
 MRN \_\_\_\_\_  
**PATIENT IDENTIFICATION LABEL**

**General management approaches to consider with conventional pressure-limited ventilation:**

Incorporate findings of the physical exam, recent chest radiographs, and trends of minute ventilation and tidal volumes into the decision-making process.

**Blood Gases:**

| Blood Gas Results                                     | Possible pathophysiology explanation                     | Possible responses with TCPL ventilator                         |
|-------------------------------------------------------|----------------------------------------------------------|-----------------------------------------------------------------|
| pCO <sub>2</sub> OK / low; paO <sub>2</sub> low       | Atelectasis with V/Q mismatch                            | Consider ↑ PEEP                                                 |
| pCO <sub>2</sub> OK / low; paO <sub>2</sub> OK / high | Overventilated                                           | Consider ↓ PIP, <b>OR</b> ↓ PIP and PEEP (with ↓ ΔP), or ↓ rate |
| pCO <sub>2</sub> OK / high; paO <sub>2</sub> low      | Atelectasis with resultant low TV                        | Consider ↑ PIP <b>OR</b> ↑ PIP and PEEP (with ↑ ΔP)             |
| pCO <sub>2</sub> OK / high; paO <sub>2</sub> high     | Inadequate minute ventilation with at least adequate FRC | Consider ↓ PEEP, ↑ rate, or ↑ PIP                               |

**Targeting Minute Ventilation (MV) to achieve desired PaCO<sub>2</sub>**

$$\text{Target MV} = \text{paCO}_2 \times \text{current MV} / \text{desired paCO}_2$$

(Example: Target MV = 40 x 160 / 50 = 240 cc/kg/min)

**If the tidal volumes are acceptable, change the rate (RR) to achieve the desired MV**

$$\text{Target RR} = \text{paCO}_2 \times \text{current RR} / \text{desired paCO}_2$$

(Example: Target RR = 40 x 30 / 50 = 24 breaths per minute)

Physician/NNP Signature \_\_\_\_\_ Credentials \_\_\_\_\_ Pager ID \_\_\_\_\_ Date \_\_\_\_\_ Time \_\_\_\_\_ AM/PM

**Signatures for sign off on orders:**

Signature \_\_\_\_\_, RN Date \_\_\_\_\_ Time \_\_\_\_\_ AM/PM

Signature \_\_\_\_\_, RRT Date \_\_\_\_\_ Time \_\_\_\_\_ AM/PM  
 ch\_peri\_landd\_post\_neo\_neonatalventgmtprotocol OTE 900668 Rev. 3/08
